# Supplementary material for: Methodological Development of a Multi-Readout Assay for the Assessment of Antiviral Drugs against SARS-CoV-2
Source: MDPI journal article supplement (doi:10.3390/pathogens10091076), 2021-08-25
Supplement: s1 [file s1]

# Methodological development of a multi-readout assay for the assessment of antiviral drugs against SARS-CoV-2

Friedrich Hahn <sup>1</sup>, Sigrun Häge <sup>1</sup>, Alexandra Herrmann <sup>1</sup>, Christina Wangen <sup>1</sup>, Jintawee Kicuntod <sup>1</sup>, Doris Jungnickl <sup>1</sup>, Julia Tillmanns <sup>1</sup>, Regina Müller <sup>1</sup>, Kirsten Fraedrich <sup>1</sup>, Klaus Überla <sup>1</sup>, Hella Kohlhof <sup>2</sup>, Armin Ensser <sup>1</sup> and Manfred Marschall <sup>1,\*</sup>

- 1 Institute for Clinical and Molecular Virology, Friedrich-Alexander University of Erlangen-Nürnberg (FAU), Erlangen, Germany; friedrich.hahn@uk-erlangen.de (F.H.); sigrun.haegel@fau.de (S.H.); alexandra.herrmann@uk-erlangen.de (A.H.); christina.wangen@uk-erlangen.de (C.W.); jintawee.kicuntod@extern.uk-erlangen.de (J.K.); doris.jungnickl@uk-erlangen.de (D.J.); jul.tillmanns@fau.de (J.T.); mueller.regina@uk-erlangen.de (R.M.); kirsten.fraedrich@uk-erlangen.de (K.F.); klaus.ueberla@fau.de (K.Ü.); armin.ensser@fau.de (A.E.); manfred.marschall@fau.de (M.M.)
  - 2 Immunic AG, Gräfelfing, Germany; hella.kohlhof@imux.com (H.K.)
- \* Correspondence: manfred.marschall@fau.de; phone +49 9131 8526089

**Table S1.** Oligonucleotide primers used in this study. The following information is given by the sequence description: translational start or stop codons (capital letters, underlined), restriction sites (capital letters, bold), additional bases (lower case letters) and coding sequences (capital letters).

| Primer                       | Sequence (5' → 3')                                                         |
|------------------------------|----------------------------------------------------------------------------|
| 5-BamHI-eCFP                 | tag <b>GGATCC</b> ATGGTGAGCAAGGGCGAGGAG                                    |
| 3-XbaI-NotI-eYFP             | tag <b>TCTAGA</b> ctcga <b>GCGGCCGCTT</b> ACTTGTACAGCTCGTCCATG             |
| 5-3CL pro Cleavage-SpeI-eYFP | GCGCTAGCGTGGCCAGACTGCAGAGCGGCTT <b>CACTAGT</b> GGCAGCGTGAGCAAGGGCGAGGAG    |
| 3-3CL pro Cleavage-NheI-eCFP | CCACTAGTGAAGCCGCTCTGCAGTCTGGCCAC <b>GCTAGC</b> GCTGCCCTTGTACAGCTCGTCCATGC  |
| 5-T2A Cleavage-eYFP          | GGGCAGCCTGCTGACCTGCGGCGACGTGGAGGAGAACCCCGGCCCGTGAGCAAGGGCGAGGAG            |
| 3-T2A Cleavage-eCFP          | GGGGTTCTCCTCCACGTCGCCGAGGTCAGCAGGCTGCCCCGGCCCTCGCCGCTGCCTTGTACAGCTCGTCCATG |

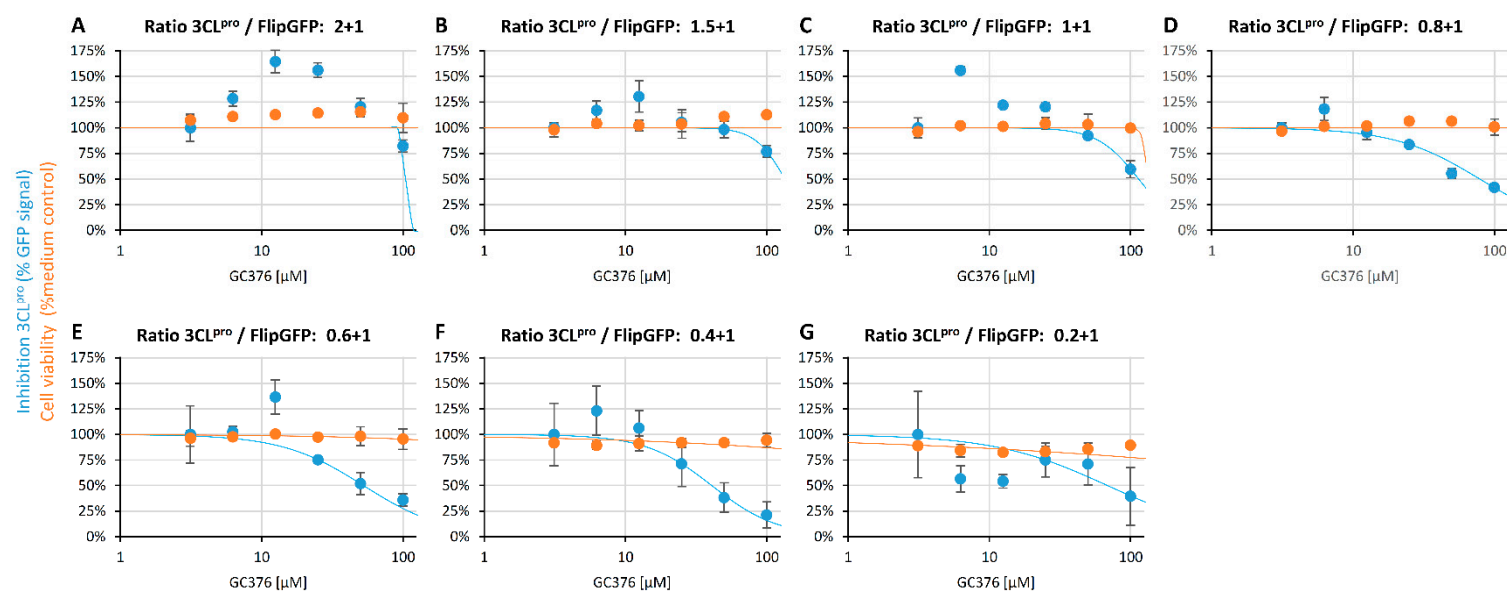

**Figure S1:** Steps of optimization of the FlipGFP assay: protease/reporter ratios (A-G). Several different ratios of transfected plasmids coding for the protease or reporter protein, respectively, were applied as indicated.
